# Supplementary material for: The effects of salbutamol on epithelial ion channels depend on the etiology of acute respiratory distress syndrome but not the route of administration
Source: Respir Res. 2014 May 2;15(1):56. doi: 10.1186/1465-9921-15-56 (PMC4026154; doi:10.1186/1465-9921-15-56)
Supplement: Additional file 2 — This file contains additional results covering two tables (Table S2 - Body weight, anesthesia and fluid therapy and Table S3 - Ventilator parameters and respiratory mechanics) and one figure (Figure S1 - Wet-to-dry (W/D) ratio). [file 1465-9921-15-56-S2.docx]

**Additional File 2**

**The effects of salbutamol on epithelial ion channels depend on the etiology of acute respiratory distress syndrome but not the route of administration**

Christopher P. Uhlig1,2*

Pedro L. Silva1*

Débora S. Ornellas1,3

Raquel S. Santos1

Paulo J. Miranda1

Peter M. Spieth2

Thomas Kiss2

Michael Kasper4

Bärbel Wiedemann5

Thea Koch2

Marcelo M. Morales3

Paolo Pelosi6

Marcelo Gama de Abreu2

Patricia R. M. Rocco1

*Dr. Uhlig and Dr. Silva contributed equally to this work.

1Laboratory of Pulmonary Investigation, Carlos Chagas Filho Biophysics Institute, Federal University of Rio de Janeiro, Av. Carlos Chagas Filho s/n, Bloco G-014, Ilha do Fundão, 21941-902, Rio de Janeiro, RJ, Brazil.

2Department of Anesthesiology and Intensive Care Therapy, Pulmonary Engineering Group, University Hospital Dresden, Technische Universität Dresden, Fetscherstr. 74, 01307, Dresden, Germany.

3Laboratory of Cellular and Molecular Physiology, Carlos Chagas Filho Biophysics Institute, Federal University of Rio de Janeiro, Av. Carlos Chagas Filho s/n, Bloco G2-048, Ilha do Fundão, 21941-902, Rio de Janeiro, RJ, Brazil.

4Institute of Anatomy, Faculty of Medicine, Technische Universität Dresden, Fetscherstr. 74, 01307, Dresden, Germany.

5Institute of Biometrics and Medical Informatics, Faculty of Medicine, Technische Universität Dresden, Fetscherstr. 74, 01307, Dresden, Germany.

6IRCCS AOU San Martino-IST, Department of Surgical Sciences and Integrated Diagnostics, University of Genoa, Largo Rosanna Benzi 8, 16132 Genoa, Italy.

*Correspondence and reprint requests to*:

Prof. Patricia R.M. Rocco, Laboratory of Pulmonary Investigation, Carlos Chagas Filho Biophysics Institute, Federal University of Rio de Janeiro, Rio de Janeiro, Brazil. Email: [prmrocco@biof.ufrj.br](mailto:prmrocco@biof.ufrj.br), Tel: +5521 25626530, Fax: +5521 22808193.

Prof. Marcelo Gama de Abreu, Pulmonary Engineering Group, Department of Anesthesiology and Intensive Care Medicine, Pulmonary Engineering Group, University Hospital Dresden, Technische Universität Dresden, Dresden, Germany. Email: [mgabreu@uniklinikum-dresden.de](mailto:mgabreu@uniklinikum-dresden.de), Tel: +493514584488, Fax: +493514584336.

**Additional Results**


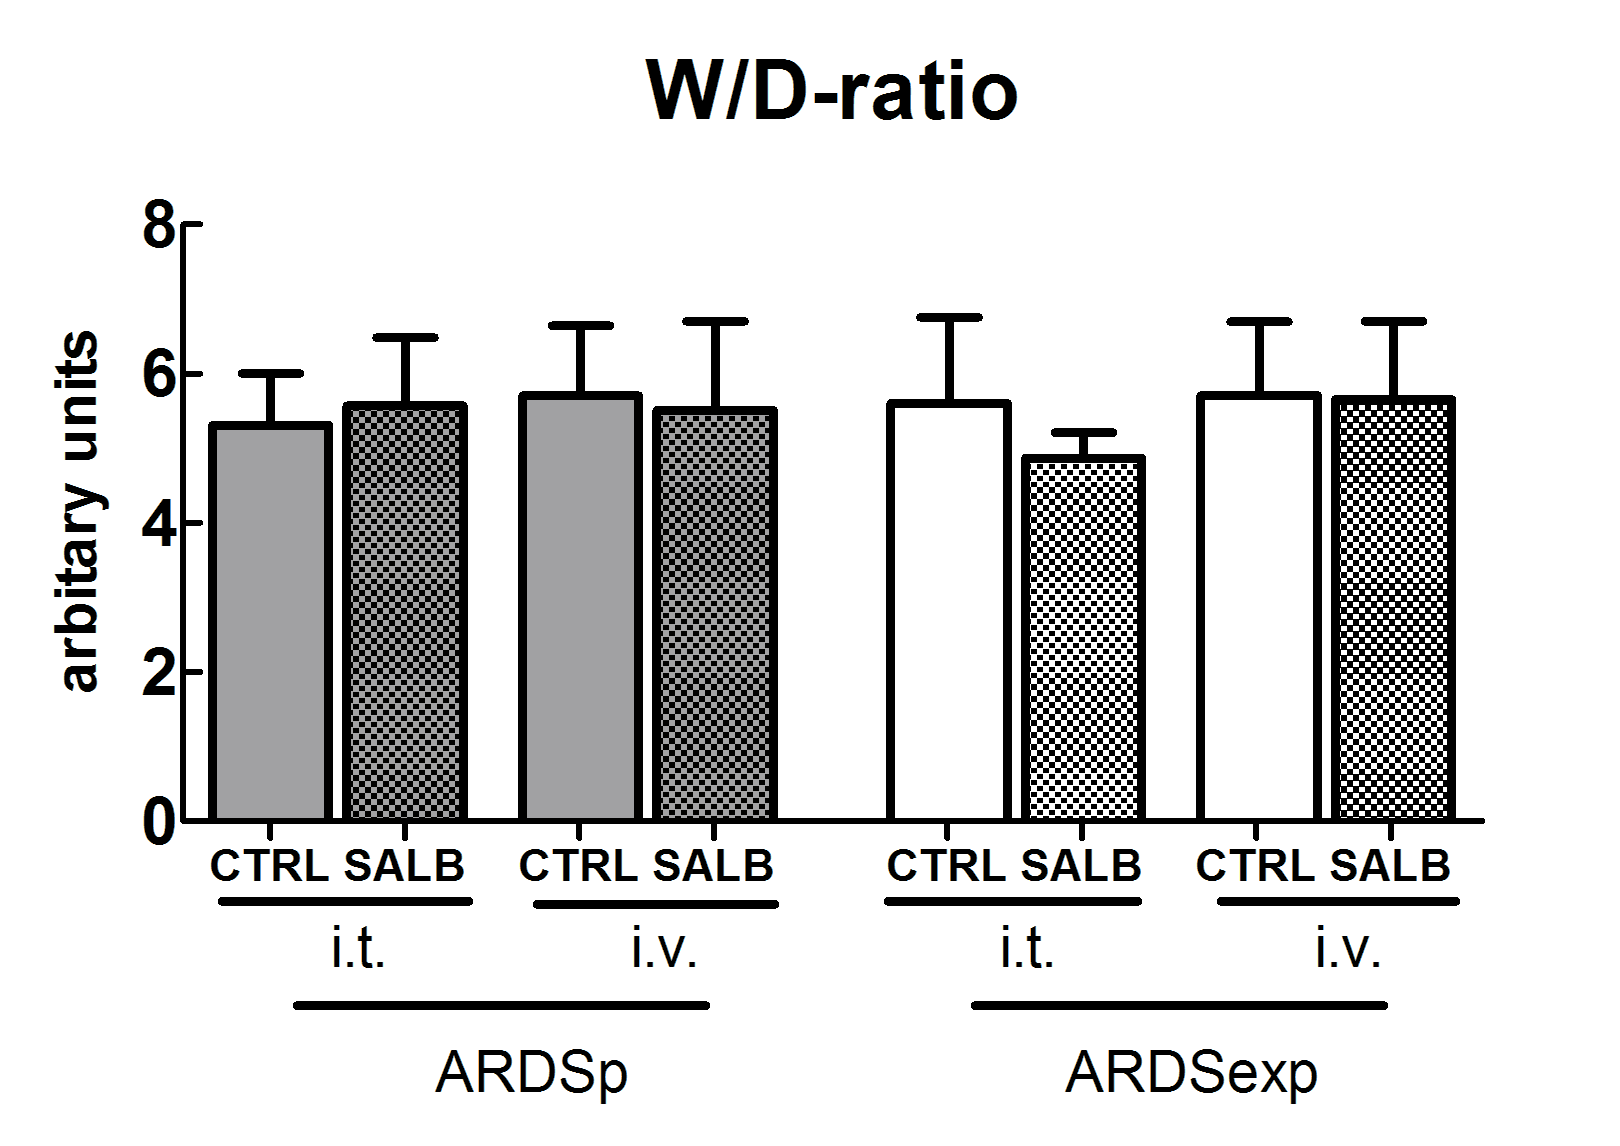


Figure S1: Wet-to-dry (W/D) ratio. All values are expressed as mean and standard deviation. Differences between groups (SALB vs. CTRL; SALB-iv vs. SALB-it) were tested separately for ARDSp and ARDSexp using one-way ANOVA followed by Bonferroni correction. Statistical significance was accepted at α = 0.05. CTRL = control; SALB = salbutamol; i.t. = intratracheally; i.v. = intravenously; ARDSp = pulmonary acute respiratory distress syndrome; ARDSexp = extrapulmonary acute respiratory distress syndrome.

**Table S2** Body weight, anesthesia and fluid therapy

| **Variable** | **ARDSp** | | | | **ARDSexp** | | | |  |
| --- | --- | --- | --- | --- | --- | --- | --- | --- | --- |
| CTRL-it | SALB-it | CTRL-iv | SALB-iv | CTRL-it | SALB-it | CTRL-iv | SALB-iv |  |
|  |  |  |  |  |  |  |  |  |  |
| **Body weight [kg]** | 0.300 ± 0.027 | 0.299 ± 0.029 | 0.290 ± 0.032 | 0.301 ± 0.035 | 0.294 ± 0.027 | 0.298 ± 0.036 | 0.295 ± 0.029 | 0.295 ± 0.015 | ns |
|  |  |  |  |  |  |  |  |  |  |
| **Midazolam [mg]** | 1.08 ± 0.24 | 1.12 ± 0.18 | 1.06 ± 0.26 | 1.05 ± 0.10 | 1.04 ± 0.20 | 1.05 ± 0.12 | 0.91 ± 0.29 | 0.98 ± 0.13 | ns |
|  |  |  |  |  |  |  |  |  |  |
| **Ketamine [mg]** | 54.1 ± 12.3 | 56.4 ± 9.5 | 53.5 ± 13.3 | 52.5 ± 5.0 | 52.3 ± 9.9 | 55.5 ± 8.7 | 45.8 ± 14.7 | 49.4 ± 6.8 | ns |
|  |  |  |  |  |  |  |  |  |  |
| **Crystalloid [mL]** | 4.3 ± 0.7 | 4.1 ± 0.4 | 4.3 ± 0.3 | 4.1 ± 0.5 | 4.3 ± 0.6 | 4.2 ± 1.0 | 4.5 ± 0.9 | 4.3 ± 4.5 | ns |
|  |  |  |  |  |  |  |  |  |  |
| **Colloid [mL]** | 1.1 ± 0.2 | 1.2 ± 0.3 | 1.6 ± 0.9 | 1.6 ± 0.7 | 1.4 ± 0.6 | 1.6 ± 0.6 | 1.1 ± 0.2 | 1.6 ± 0.7 | ns |
|  |  |  |  |  |  |  |  |  |  |

All values are expressed as mean and standard deviation. Differences between groups were tested separately for ARDSp and ARDSexp using one-way ANOVA followed by Bonferroni correction. Statistical significance was accepted at α = 0.05. ns = non-significant; CTRL = control; SALB = salbutamol; it = intratracheally; iv = intravenously; ARDSp = pulmonary acute respiratory distress syndrome; ARDSexp = extrapulmonary acute respiratory distress syndrome.

**Table S3** Ventilator parameters and respiratory mechanics

| Variable | | | **ARDSp** | | | | **ARDSexp** | | | |
| --- | --- | --- | --- | --- | --- | --- | --- | --- | --- | --- |
| CTRL-it | SALB-it | CTRL-iv | SALB-iv | CTRL-it | SALB-it | CTRL-iv | SALB-iv |
| **VT [mL]** |  | |  |  |  |  |  |  |  |  |
|  | BL2 | | 6.02 ± 0.32 | 6.01 ± 0.45 | 6.01 ± 0.43 | 6.99 ± 0.46 | 6.08 ± 0.45 | 6.13 ± 0.33 | 5.94 ± 0.25 | 5.78 ± 0.32 |
|  | T30 | | 5.86 ± 0.28 | 6.04 ± 0.85 | 6.10 ± 0.52 | 6.27 ± 0.48 | 6.10 ± 0.35 | 6.10 ± 0.50 | 5.96 ± 0.62 | 6.02 ± 0.32 |
|  | T60 | | 6.19 ± 0.38 | 5.68 ± 0.37 | 6.60 ± 0.63 | 6.11 ±0.40 | 5.99 ± 0.51 | 6.31 ± 0.41 | 5.89 ± 0.81 | 6.02 ± 0.46 |
|  | Time effect | | Ns | | | | ns | | | |
|  | Interaction | | p<0.05 | | | | ns | | | |
|  | Group effect | | Ns | | | | ns | | | |
| **RR [1/min]** |  | |  |  |  |  |  |  |  |  |
|  | BL2 | | 79 ± 1 | 79 ± 1 | 79 ± 1 | 79 ± 1 | 79 ± 0 | 79 ± 1 | 79 ± 1 | 79 ± 1 |
|  | T30 | | 79 ± 1 | 80 ± 0 | 79 ± 1 | 79 ± 1 | 79 ± 1 | 80 ± 0 | 79 ± 1 | 79 ± 2 |
|  | T60 | | 79 ± 1 | 79 ± 1 | 79 ± 1 | 79 ± 1 | 79 ± 1 | 79 ± 1 | 79 ± 1 | 79 ± 1 |
|  | Time effect | | Ns | | | | ns | | | |
|  | Interaction | | Ns | | | | ns | | | |
|  | Group effect | | Ns | | | | ns | | | |
| **MV [L/min]** |  | |  |  |  |  |  |  |  |  |
|  | BL2 | | 0.143 ± 0.011 | 0.142 ± 0.019 | 0.143 ± 0.016 | 0.147 ± 0.017 | 0.139 ± 0.012 | 0.136 ± 0.010 | 0.136 ± 0.019 | 0.141 ± 0.010 |
|  | T30 | | 0.144 ± 0.022 | 0.149 ± 0.015 | 0.140 ± 0.020 | 0.150 ± 0.020 | 0.136 ± 0.015 | 0.145 ± 0.021 | 0.137 ± 0.011 | 0.141 ± 0.014 |
|  | T60 | | 0.152 ± 0.028 | 0.138 ± 0.017 | 0.140 ± 0.012 | 0.152 ± 0.021 | 0.136 ± 0.016 | 0.147 ± 0.021 | 0.137 ± 0.017 | 0.143 ± 0.008 |
|  | Time effect | | Ns | | | | ns | | | |
|  | Interaction | | Ns | | | | ns | | | |
|  | Group effect | | Ns | | | | ns | | | |
| **Pawpeak [cmH2O]** | | |  |  |  |  |  |  |  |  |
|  | BL2 | | 11.8 ± 5.5 | 10.0 ± 5.1 | 12.0 ± 3.5 | 14.6 ± 2.3 | 13.1 ± 3.6 | 13.8 ± 3.1 | 10.3 ± 3.3 | 11.8 ± 3.6 |
|  | T30 | | 14.6 ± 4.5 | 15.0 ± 5.3 | 12.6 ± 3.3 | 13.0 ± 3.1 | 11.6 ± 3.7 | 17.8 ± 4.1 | 14.5 ± 3.4 | 13.1 ± 2.7 |
|  | T60 | | 15.7 ± 4.3 | 13.8 ± 5.4 | 14.9 ± 2.8 | 14.7 ± 1.9 | 13.0 ± 1.5 | 16.1 ± 3.8 | 13.8 ± 3.5 | 12.5 ± 2.2 |
|  | Time effect | | p<0.05 | | | | p<0.05 | | | |
|  | Interaction | | Ns | | | | ns | | | |
|  | Group effect | | Ns | | | | ns | | | |
| **Pawmean [cmH2O]** | | |  |  |  |  |  |  |  |  |
|  | | BL2 | 7.1 ± 5.4 | 8.1 ± 2.7 | 7.9 ± 1.6 | 9.5 ± 1.7 | 8.1 ± 2.8 | 9.0 ± 2.8 | 5.9 ± 2.2 | 7.0 ± 3.0 |
|  | | T30 | 8.0 ± 4.0 | 9.1 ± 4.9 | 8.0 ± 2.3 | 7.5 ± 2.3 | 7.1 ± 2.5 | 11.6 ± 4.0 | 9.1 ± 3.0 | 7.6 ± 2.2 |
|  | | T60 | 9.2 ± 5.0 | 8.0 ± 5.1 | 9.3 ± 2.3 | 8.4 ± 2.0 | 7.2 ± 1.5 | 9.8 ± 3.7 | 8.1 ± 3.2 | 6.8 ± 2.2 |
|  | | Time effect | Ns | | | | ns | | | |
|  | | Interaction | Ns | | | | ns | | | |
|  | | Group effect | Ns | | | | ns | | | |
| **Ers [mL/cmH2O]** | | |  |  |  |  |  |  |  |  |
|  | BL2 | | 4.44 ± 0.88 | 3.56 ± 1.55 | 4.03 ± 1.09 | 4.62 ± 1.44 | 4.78 ± 0.91 | 4.53 ± 1.38 | 4.58 ± 1.25 | 4.03 ± 0.59 |
|  | T30 | | 5.48 ± 0.65 | 5.26 ± 1.25 | 4.83 ± 0.83 | 5.22 ± 1.76 | 5.19 ± 1.11 | 6.31 ± 1.81 | 6.13 ± 0.83 | 5.69 ± 1.63 |
|  | T60 | | 5.94 ± 1.27 | 5.73 ± 0.83 | 5.84 ± 1.13 | 6.48 ± 1.75 | 6.37 ± 1.28 | 6.56 ± 1.40 | 6.67 ± 0.83 | 5.93 ± 0.59 |
|  | Time effect | | p<0.001 | | | | p<0.001 | | | |
|  | Interaction | | Ns | | | | ns | | | |
|  | Group effect | | Ns | | | | ns | | | |
| **Rrs [cmH2O/L/s]** | | |  |  |  |  |  |  |  |  |
|  | BL2 | | 152.0 ± 21.9 | 181.0 ± 109.5 | 148.3 ± 66.5 | 151.3 ± 72.6 | 172.3 ± 50.8 | 194.0 ± 94.2 | 143.4 ± 57.8 | 161.8 ± 59.2 |
|  | T30 | | 177.3 ± 32.8 | 269.5 ± 109.1 | 163.3 ± 44.5 | 185.9 ± 122.9 | 205.3 ± 85.5 | 265.7 ± 139.1 | 262.6 ± 129.4 | 236.3 ± 92.8 |
|  | T60 | | 168.9 ± 58.8 | 265.2 ± 161.7 | 195.9 ± 74.2 | 236.3 ± 108.4 | 275.3 ± 168.1 | 226.7 ± 75.5 | 278.1 ± 168.9 | 252.4 ± 114.6 |
|  | Time effect | | p<0.05 | | | | p<0.001 | | | |
|  | Interaction | | Ns | | | | ns | | | |
|  | Group effect | | Ns | | | | ns | | | |

All values are expressed as mean and standard deviation. Differences between and within groups (*group and time effects, BL2-T60 as well as their interactions*) were tested with two-way ANOVA and adjusted for repeated measures according to the Bonferroni method for ARDSp and ARDSexp separately. Statistical significance was accepted at α = 0.05. ns = non-significant; CTRL = control; SALB = salbutamol; it = intratracheally; iv = intravenously; ARDSp = pulmonary acute respiratory distress syndrome; ARDSexp = extrapulmonary acute respiratory distress syndrome; BL2 = baseline 2; T30 and T60 = 30 and 60 min after initiation of therapy; VT = tidal volume; RR = respiratory rate; MV = minute ventilation; Pawpeak = peak inspiratory airway pressure; Pawmean = mean inspiratory airway pressure; Ers = elastance of the respiratory system; Rrs = resistance of the respiratory system.
